RESEARCH ARTICLE

# Evaluation of adverse events and comorbidity exacerbation following the COVID-19 booster dose: A national survey among randomly-selected booster recipients

Dvora Frankenthal<sup>1\*</sup>, Miri Zatlawi<sup>1</sup>, Ziv Karni-Efrati<sup>1,2</sup>, Lital Keinan-Boker<sup>1,3</sup>, Aharon Glatman-Freedman<sup>1,4</sup>, Michal Bromberg<sup>1,4</sup>

**1** Ministry of Health, The Israel Center for Disease Control, Ramat Gan, Israel, **2** Center for Research and Study of Aging, University of Haifa, Haifa, Israel, **3** School of Public Health, University of Haifa, Haifa, Israel, **4** The school of Public Health, Faculty of Medical and Health Sciences, Tel Aviv University, Tel Aviv, Israel

☞ These authors contributed equally to this work.

\* [dvora.frankenthal@MOH.GOV.IL](mailto:dvora.frankenthal@MOH.GOV.IL)

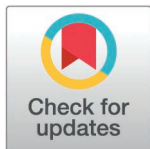

## OPEN ACCESS

**Citation:** Frankenthal D, Zatlawi M, Karni-Efrati Z, Keinan-Boker L, Glatman-Freedman A, Bromberg M (2025) Evaluation of adverse events and comorbidity exacerbation following the COVID-19 booster dose: A national survey among randomly-selected booster recipients. PLoS One 20(7): e0326231. <https://doi.org/10.1371/journal.pone.0326231>

**Editor:** Amirhossein Akhavan-Sigari, Stanford University School of Medicine, UNITED STATES OF AMERICA

**Received:** January 29, 2025

**Accepted:** May 27, 2025

**Published:** July 11, 2025

**Copyright:** © 2025 Frankenthal et al. This is an open access article distributed under the terms of the [Creative Commons Attribution License](https://creativecommons.org/licenses/by/4.0/), which permits unrestricted use, distribution, and reproduction in any medium, provided the original author and source are credited.

**Data availability statement:** Data cannot be shared publicly because of the Ministry of Health policy. Data are available from the Israel

## Abstract

### Background

Periodic vaccination against COVID-19 persists with a recommendation to vaccinate especially older people and the chronically ill. However, vaccination compliance is low, likely due to concerns regarding adverse events (AEs).

### Objective

To systematically and proactively evaluate the occurrence, onset, duration, and severity of self-reported AEs and comorbidities exacerbations that appeared up to 21–30 days following the third (booster) Pfizer BNT162b2 vaccine dose, and to examine the associations between the occurrence of any AEs and sociodemographic and pre-existing comorbidities.

### Methods

A cross-sectional telephone survey among a nationally representative sample of Israeli vaccinated adults aged ≥18 was conducted from September through October 2021. Sociodemographic data was extracted from the Ministry of Health vaccination database, and data on AEs and comorbidities were collected using a structured questionnaire.

### Results

Overall, 2,049 participants completed the survey (71.4% response rate). A total of 1360 (66.4%) reported at least one AE following the booster vaccine. The most

Center for Disease Control upon reasonable request by email [ICDC@MOH.GOV.IL](mailto:ICDC@MOH.GOV.IL).

**Funding:** The author(s) received no specific funding for this work.

**Competing interests:** The authors have declared that no competing interests exist.

frequently reported AEs were local (55.7%) and mild systemic (48.6%) reactions (i.e., fatigue, headache, fever), followed by neurological (4.5%) and allergic (3.9%) reactions. Exacerbation of comorbidities following the booster dose was most frequently reported by individuals with autoimmune or mental conditions. Most local (80.1%) and systemic (69.5%) reactions lasted up to three days. Only 8.3% sought medical care. Menstrual changes were reported by 9.6% of women aged <54 years. The occurrence of any AEs was associated with younger age, female gender, higher socioeconomic status, and living in suburban communities. AEs were not associated with pre-existing comorbidities.

## Conclusion

Most AEs were mild to moderate and transient. They were associated with younger age, but not with pre-existing chronic diseases. Since the primary target population for vaccination consists of older individuals and those with comorbidities, we believe the current findings may assist in reducing COVID-19 vaccine hesitancy among these populations.

## Introduction

Safety is paramount for vaccine acceptance and use. In December 2020, Israel initiated a mass vaccination campaign against SARS-CoV-2 with the Pfizer-Biontech® BNT162b2 vaccine [1]. By May 2021, approximately 80% of Israel's adult population had received two doses of the vaccine [2]. With continuing circulation of SARS-CoV-2 changing variants, repeated vaccination is recommended, primarily for people ≥65 years old and those with pre-existing medical conditions [3]. In October 2024, the US Centers for Disease Control and Prevention (CDC), recommended that individuals ≥65 years old and those who are moderately or severely immunocompromised receive two doses of the 2024–2025 COVID-19 vaccine, six months apart [4].

However, compliance with the booster vaccines, in many countries, has been lower than that of the primary COVID-19 vaccine doses [5,6]. Specifically, while the mean reported vaccination rates for the first two doses was 75.2% (standard deviation, SD, 13.4%), the mean reported rate for the booster dose was 44.9% (SD 17.2%) in a sample of countries from around the world [5]. The main reasons reported for vaccine and booster hesitancy included insufficient safety data, fear of the vaccine's adverse events (AEs), altered perception of disease risk, and distrust of government [5].

In various countries across the globe, including Israel, vaccine AEs are monitored mostly by voluntary passive reporting to a vaccine AEs reporting system done by either healthcare workers or the vaccinees themselves [7–14]. However, AEs recorded in these systems have been prone to underreporting [15]. During the COVID-19 pandemic, other platforms for AE reporting were used in the United States [16]. Some platforms were voluntary active mobile telephone-based, while others

relied on medical claims or clinical studies [16]. As repeated COVID-19 booster vaccines are likely to be recommended, it is important to provide comprehensive information about potential AEs, to reduce hesitancy. Recent post-marketing studies on AEs following booster doses of mRNA COVID-19 vaccines used passively reported data (such as Vaccine Adverse Event Reporting System, VAERS) [14,17–19], voluntary active mobile telephone-based surveillance system [19], self-controlled case series methods [20,21], or evaluated only specific AEs [17,18,22].

To our knowledge, to date, there is limited data on self-reported AEs after the mRNA COVID-19 booster vaccine of vaccinated adults who were approached systematically and proactively. Therefore, this survey aimed to systematically and actively examine the occurrence, onset, duration, and severity of self-reported AEs, and comorbidities exacerbations up to 21–30 days after the third (booster) dose of the Pfizer-Biontech® BNT162b2 vaccine among a nationally representative sample of Israeli vaccinated adults. A secondary aim was to examine the associations between the occurrence of any AEs and sociodemographic and pre-existing comorbidities.

## Materials and methods

### Survey population

This national cross-sectional telephone survey was conducted between September 19 and October 25, 2021, by the Israel Center for Disease Control (ICDC). A random sample of telephone numbers of vaccinated adults was extracted from the Ministry of Health repository of COVID-19 vaccinations using SAS statistical software version 9.4 (Cary, NC, USA). Each COVID-19 vaccine administered in Israel was individually recorded in the repository with data regarding the vaccinee [1]. The random sample was stratified by sex and age groups (18–39, 40–59, and ≥60 years) of the vaccinee. The sample included community-dwelling adults aged ≥18 who received the BNT162b2 booster dose 21–30 days before the survey. Participants were excluded from the sample if they were documented as SARS-CoV-2-positive at any time before the survey, or did not speak Hebrew. SARS-CoV-2 status was determined based on documentation in the national SARS-CoV-2 tests database [1,23]. The interviews were conducted in Hebrew using a Computer Assisted Telephone Interview (CATI) system.

### Questionnaire

A structured and comprehensive questionnaire was developed by the ICDC.

The questionnaire aimed to assess the occurrence, onset time, duration, and severity of AEs following the booster vaccine dose.

AEs were evaluated by asking respondents whether they had any AE after the third vaccine dose. If they answered positively, they were then asked about any local reactions using a structured list. Participants who reported AEs not included in the list were invited to describe them in their own words.

The onset and duration of local reactions were categorized into specific time intervals.

The severity of the local reactions was measured by inquiring whether respondents experienced difficulties in regular daily activities, sought medical care, and/or were hospitalized.

Comparison to local reactions after previous doses of the vaccine was assessed by asking the respondents whether similar reactions appeared either after the first or the second COVID-19 vaccine dose. If the answer was positive, respondents were asked to qualify whether those were milder, worse, or of similar severity.

A similar set of questions was repeated for systemic (i.e., fatigue, headache, myalgia/ arthralgia, chills, fever, gastrointestinal symptoms, dizziness, chest pain, lymphadenopathy, cough, anxiety, other), allergic (i.e., itching, dyspnea, rash, swelling of face or throat, other), neurological (i.e., vision disorders, hearing disorders, memory loss, seizures, paresthesia, Bell's palsy, syncope, other) and other reactions (i.e., herpes zoster, herpes simplex, menstrual changes among women aged <54 years, other). If the answer was positive for menstrual changes, participants were asked to describe the changes and to report whether they had menstrual cycle irregularities before the first COVID-19 vaccine. Women

who reported changes following the booster were contacted again four months post-vaccination and asked whether their period cycle had returned to the regular pattern and when (one-/2-/3-/4-months post-vaccination/not to date).

Prevalence of comorbidities (i.e., hypertension, lung disease, diabetes, heart disease, depression and/or anxiety, autoimmune disease) and whether they had exacerbated following the booster dose were also assessed.

### Sociodemographic variables

The following sociodemographic variables were obtained from the COVID-19 vaccine database: age, sex, socioeconomic status (based on the statistical geographic area of the respondents' residence), and residence. These variables were grouped by age (18–39, 40–59,  $\geq 60$  years of age), sex (female, male), socioeconomic status (low, medium, high), and type of residence (city, local council, suburban community).

### Sample size

The prevalence of systemic AEs after the booster COVID-19 vaccine was estimated as 25% which aligns with the rate reported in the literature for systemic AEs after the BNT162b2 second booster vaccine [24]. The margin of error and confidence level were defined as 2.0 and 95% respectively. To meet these criteria, the minimum recommended sample size was determined to be 1,800 participants. This sample size was calculated using Epi Info, an open-source calculator (<https://www.cdc.gov/epiinfo/index.html>).

### Statistical analysis

Bivariate analyses was performed using a Pearson's Chi-square test to compare sociodemographic and health-related characteristics between participants who reported any AEs and those who did not. A multivariate logistic regression model was applied to determine the associations between the occurrence of any AEs and participants' characteristics. Sociodemographic and health-related variables such as age, sex, socioeconomic status, residence, and the presence of comorbidity were entered into the multivariate logistic regression model only if they demonstrated a significance level of  $p < 0.1$  in bivariate analyses. A p-value of  $< 0.05$  was considered statistically significant. Data were analyzed using SAS statistical software version 9.4 (Cary, NC, USA).

### Ethics statement

Ethical approval for the study was waived by the National Ethical Committee for Human Medical Research of the Israel Ministry of Health. The committee determined that the survey was part of the Ministry of Health's official activities. Verbal informed consent was obtained from each participant after a brief explanation of the health survey, including its objectives and significance. The consent to participate was documented in the questionnaire. All data collected were coded anonymously to ensure confidentiality.

## Results

### Survey population

A random sample of 4,945 telephone numbers of Israeli citizens vaccinated with a third dose of the BNT162b2 vaccine 21–30 days ago was extracted. After applying the survey's exclusion criteria, a total of 2,894 people remained eligible to participate. Of them, 2,068 participants were interviewed (response rate of 71.4%). After excluding 19 inconsistent interviews, the sample for statistical analysis included 2,049 participants (S1 Table). The average age was  $47.7 \pm 16.7$  (years  $\pm$  SD) and about half (49.1%) of the participants were females. To assess potential non-response bias, we compared the sociodemographic characteristics of survey respondents with those of non-respondents. Our analysis revealed no differences in age, sex, and type of residence between non-respondents and respondents (S2 Table). However, a higher

percentage of individuals with lower socioeconomic status did not respond to the survey compared to those who did respond (24.4% vs. 16.4%).

[Table 1](#) presents the sociodemographic and health-related characteristics of the study participants by AE occurrence. A total of 1,360 (66.4%) participants reported at least one AE following the booster vaccine. AEs were more prevalent among younger ages, females, individuals with higher socioeconomic status, and participants without pre-existing comorbidities.

## Adverse events

[Table 2](#) shows that the most frequently reported AEs were local (55.7%), followed by systemic (48.6%), neurological (4.5%) and allergic (3.9%) reactions. A total of 59 (9.6%) of the 615 women aged <54 years reported menstrual changes following the booster dose. One patient (0.05), a 43-year-old female, reported myocarditis.

[Table 3](#) demonstrates that most local and systemic reactions occurred within the first 24 hours after vaccination and lasted up to three days. On the other hand, neurological, allergic, and other AEs, that were less frequently reported, occurred in substantial proportions also later on, including 1–4 weeks post-vaccination, with many symptoms still prevalent at the time the interview took place (21–30 days following the booster vaccine). Moreover, 9.4%–21.1% of participants who reported AEs described worse AEs after the third vaccine dose, as compared to previous doses.

Multivariate logistic regression analysis ([Table 4](#)) showed that reporting AEs was associated with younger age, female sex, higher socioeconomic status, and living in suburban communities. AEs were not associated with the presence of pre-existing comorbidities.

## Exacerbation of comorbidities

[Table 5](#) demonstrates comorbidities exacerbations following the booster dose reported by participants with comorbidities. Exacerbations were most commonly reported by participants with depression and/or anxiety (26.4%) followed by participants with autoimmune diseases (24.2%). Exacerbations of other comorbidities were reported in less than 10% of participants for each specific comorbidity.

## Health impacts

Among participants with any AE, 589 (44.1%) reported difficulties in regular daily activities due to the AE. However, only 107 (8.3%) sought medical care and 6 (0.5%) were hospitalized ([Table 6](#)). Participants who reported having both local and non-local AEs constituted the largest group of those reporting health impacts ([Table 6](#)). Among the hospitalized patients, two were hospitalized with chest pain, and two had syncope and dyspnea. The patient who reported myocarditis reported being referred to the emergency department but was not subsequently hospitalized.

## Menstrual cycle changes

Of 59 (9.6%) women aged <54 years who reported menstrual changes following the booster dose, only 45 described the menstrual cycle changes. [Table 7](#) shows that the main reported menstrual cycle changes were delayed onset of menstruation (N=21, 46.7%), heavy menstrual bleeding (N= 15, 33.3%), and earlier menstruation (N= 13, 28.9%). Most women (N=39, 88.6%) reported no menstrual cycle irregularities before the first COVID-19 vaccine dose. About a third of women (N= 16) reported that they had menstrual cycle irregularities also after the first or second COVID-19 vaccine. A follow-up telephone contact four months after the booster dose was successfully established with 41 women. In approximately a quarter of the women (N= 11, 26.8%) the menstrual cycle returned to normal after one cycle, in 5 (12.2%) and 4 (9.8%) of them, the menstrual cycle returned to normal after two and three months, respectively. However, in approximately half (N=21, 51.2%) of the women, the menstrual changes remained four months post-vaccination.

**Table 1. Sociodemographic characteristics and pre-existing comorbidities among survey participants (N=2,049) by adverse events occurrence.**

| Variable                             | Total<br>N=2049<br>N (%) | Adverse events<br>N=1360<br>N (%) | No adverse events<br>N=689<br>N (%) | P-value |
|--------------------------------------|--------------------------|-----------------------------------|-------------------------------------|---------|
| <b>Age groups (years)</b>            |                          |                                   |                                     |         |
| 18-39                                | 653 (31.9)               | 466 (34.3)                        | 187 (27.1)                          | <0.001  |
| 40-59                                | 751 (36.6)               | 525 (38.6)                        | 226 (32.8)                          |         |
| 60+                                  | 645 (31.5)               | 369 (27.1)                        | 276 (40.1)                          |         |
| <b>Sex</b>                           |                          |                                   |                                     |         |
| Male                                 | 1,044 (50.9)             | 602 (44.3)                        | 442 (64.1)                          | <0.001  |
| Female                               | 1,005 (49.1)             | 758 (55.7)                        | 247 (35.9)                          |         |
| <b>Residence</b>                     |                          |                                   |                                     |         |
| City                                 | 1,539 (75.1)             | 1,004 (73.8)                      | 535 (77.7)                          | <0.01   |
| Local council                        | 276 (13.5)               | 180 (13.2)                        | 96 (13.9)                           |         |
| Suburban community                   | 234 (11.4)               | 176 (12.9)                        | 58 (8.4)                            |         |
| <b>Socioeconomic category status</b> |                          |                                   |                                     |         |
| Low                                  | 326 (16.4)               | 184 (13.9)                        | 142 (21.4)                          | <0.001  |
| Medium                               | 1,061 (53.4)             | 715 (54.1)                        | 346 (52.0)                          |         |
| High                                 | 599 (30.2)               | 422 (32.0)                        | 177 (26.6)                          |         |
| Missing (N=63)                       |                          |                                   |                                     |         |
| <b>Comorbidities<sup>1</sup></b>     |                          |                                   |                                     |         |
| Yes                                  | 659 (33.0)               | 406 (30.8)                        | 253 (37.2)                          | <0.05   |
| No                                   | 1339 (67.0)              | 912 (69.2)                        | 427 (62.8)                          |         |
| Missing (N=51)                       |                          |                                   |                                     |         |
| <b>Hypertension</b>                  |                          |                                   |                                     |         |
| Yes                                  | 285 (14.1)               | 170 (12.8)                        | 115 (16.8)                          | <0.05   |
| No                                   | 1732 (85.9)              | 1162 (87.2)                       | 570 (83.2)                          |         |
| Missing (N=32)                       |                          |                                   |                                     |         |
| <b>Lung disease</b>                  |                          |                                   |                                     |         |
| Yes                                  | 201 (9.9)                | 130 (9.6)                         | 71 (10.4)                           | 0.614   |
| No                                   | 1833 (90.1)              | 1218 (90.4)                       | 615 (89.6)                          |         |
| Missing (N=15)                       |                          |                                   |                                     |         |
| <b>Diabetes</b>                      |                          |                                   |                                     |         |
| Yes                                  | 151 (7.5)                | 77 (5.8)                          | 74 (10.9)                           | <0.001  |
| No                                   | 1867 (92.5)              | 1260 (94.2)                       | 607 (89.1)                          |         |
| Missing (N=31)                       |                          |                                   |                                     |         |
| <b>Heart disease</b>                 |                          |                                   |                                     |         |
| Yes                                  | 110 (5.4)                | 60 (4.5)                          | 50 (7.3)                            | <0.01   |
| No                                   | 1917 (94.6)              | 1282 (95.5)                       | 635 (92.7)                          |         |
| Missing (N=22)                       |                          |                                   |                                     |         |
| <b>Depression and/or anxiety</b>     |                          |                                   |                                     |         |
| Yes                                  | 91 (4.5)                 | 63 (4.7)                          | 28 (4.1)                            | 0.530   |
| No                                   | 1932 (95.5)              | 1276 (95.3)                       | 656 (95.9)                          |         |
| Missing (N=26)                       |                          |                                   |                                     |         |
| <b>Autoimmune Disease</b>            |                          |                                   |                                     |         |
| Yes                                  | 62 (3.1)                 | 39 (2.9)                          | 23 (3.4)                            | 0.565   |
| No                                   | 1962 (96.9)              | 1303 (97.1)                       | 659 (96.6)                          |         |
| Missing (N=25)                       |                          |                                   |                                     |         |

<sup>1</sup> Comorbidities included hypertension and/or lung disease and/or diabetes and/or heart disease and/or depression and/or anxiety and/or autoimmune disease.

<https://doi.org/10.1371/journal.pone.0326231.t001>



**Table 2. Adverse events (AEs) after the BNT162b2 booster dose reported by survey participants (N=2,049).**

| AEs Category           | AE                                                           | Participants [N (%)] |
|------------------------|--------------------------------------------------------------|----------------------|
| Any                    |                                                              | <b>1,360 (66.4)</b>  |
| Local reactions        | Any                                                          | 1,140 (55.7)         |
|                        | Pain                                                         | 1,108 (54.2)         |
|                        | Limitation in arm mobility                                   | 473 (23.3)           |
|                        | Swelling                                                     | 257 (12.6)           |
|                        | Enlarged lymph nodes                                         | 185 (9.1)            |
|                        | Redness                                                      | 131 (6.5)            |
| Systemic reactions     | Any                                                          | 995 (48.6)           |
|                        | Fatigue                                                      | 856 (42.5)           |
|                        | Headache                                                     | 529 (26.3)           |
|                        | Myalgia/Arthralgia                                           | 520 (25.7)           |
|                        | Chills                                                       | 344 (17.1)           |
|                        | Fever (>38.0°C)                                              | 306 (15.2)           |
|                        | Gastrointestinal                                             | 191 (9.6)            |
|                        | Dizziness                                                    | 186 (9.3)            |
|                        | Chest pain                                                   | 110 (5.5)            |
|                        | Lymphadenopathy                                              | 84 (4.2)             |
|                        | Cough                                                        | 78 (3.9)             |
|                        | Anxiety                                                      | 41 (2.0)             |
|                        | Other <sup>1</sup>                                           | 40 (2.0)             |
| Neurological reactions | Any                                                          | 91 (4.5)             |
|                        | Paresthesia                                                  | 68 (3.4)             |
|                        | Bell's palsy                                                 | 11 (0.5)             |
|                        | Vision disorder/blurred vision                               | 11 (0.5)             |
|                        | Memory loss                                                  | 8 (0.4)              |
|                        | Hearing disorder                                             | 7 (0.4)              |
|                        | Seizures                                                     | 4 (0.2)              |
|                        | Syncope                                                      | 3 (0.2)              |
| Allergic reactions     | Any                                                          | 80 (3.9)             |
|                        | Rash                                                         | 40 (2.0)             |
|                        | Itching                                                      | 34 (1.7)             |
|                        | Dyspnea                                                      | 30 (1.5)             |
|                        | Swelling of face or throat                                   | 13 (0.6)             |
| Other AEs              | Any                                                          | 83 (4.1)             |
|                        | Herpes simplex                                               | 4 (0.2)              |
|                        | Herpes zoster                                                | 3 (0.2)              |
|                        | Menstrual changes among women <54 years (N=615) <sup>2</sup> | 59 (9.6)             |
|                        | Myocarditis                                                  | 1 (0.05)             |
|                        | Other <sup>2</sup>                                           | 21 (1.0)             |

<sup>1</sup> "Other" included sore throat, nasal congestion, swelling/heaviness of legs, mouth sores, low-grade fever, hair loss, hot flashes, restlessness;

<sup>2</sup> "Other" included eye disorders, change in smell/taste.

<https://doi.org/10.1371/journal.pone.0326231.t002>

**Table 3. Onset, duration, and severity of adverse events after the BNT162b2 booster dose by type of adverse reaction.**

|                                                                                      | Local reactions<br>N (%) | Systemic reactions<br>N (%) | Neurological reactions<br>N (%) | Allergic reactions<br>N (%) | Other adverse events<br>N (%) |
|--------------------------------------------------------------------------------------|--------------------------|-----------------------------|---------------------------------|-----------------------------|-------------------------------|
| <b>Onset of adverse event</b>                                                        |                          |                             |                                 |                             |                               |
| Within 24 hours                                                                      | 858 (76.1)               | 583 (59.8)                  | 35 (42.2)                       | 26 (35.1)                   | 7 (14.3)                      |
| Within 1–7 days                                                                      | 259 (23.0)               | 327 (33.5)                  | 24 (28.9)                       | 26 (35.1)                   | 19 (38.8)                     |
| Within 1–4 weeks                                                                     | 10 (0.9)                 | 65 (6.7)                    | 24 (28.9)                       | 22 (29.7)                   | 23 (46.9)                     |
| Missing (N)                                                                          | 13                       | 20                          | 8                               | 6                           | 34                            |
| <b>Duration of adverse event</b>                                                     |                          |                             |                                 |                             |                               |
| Up to 24 hours                                                                       | 269 (23.8)               | 261 (26.8)                  | 19 (21.3)                       | 7 (9.2)                     | 1 (2.2)                       |
| Between 1–3 days                                                                     | 636 (56.3)               | 415 (42.7)                  | 18 (20.2)                       | 19 (25.0)                   | 6 (13.3)                      |
| Between 4–7 days                                                                     | 158 (14.0)               | 115 (11.8)                  | 7 (7.9)                         | 14 (18.4)                   | 8 (17.8)                      |
| >7 days                                                                              | 42 (3.7)                 | 58 (6.0)                    | 3 (3.4)                         | 11 (14.5)                   | 11 (24.4)                     |
| Has not resolved to date                                                             | 24 (2.1)                 | 124 (12.7)                  | 42 (47.2)                       | 25 (32.9)                   | 19 (42.2)                     |
| Missing (N)                                                                          | 11                       | 22                          | 2                               | 4                           | 38                            |
| <b>Severity in comparison to similar adverse events after previous vaccine doses</b> |                          |                             |                                 |                             |                               |
| Milder                                                                               | 157 (14.0)               | 149 (15.3)                  | 5 (5.6)                         | 5 (6.7)                     | 1 (1.9)                       |
| Worse                                                                                | 237 (21.1)               | 165 (16.9)                  | 11 (12.4)                       | 15 (20.0)                   | 5 (9.4)                       |
| Similar                                                                              | 478 (42.5)               | 245 (25.2)                  | 18 (20.2)                       | 8 (10.7)                    | 15 (28.3)                     |
| Not applicable <sup>1</sup>                                                          | 252 (22.4)               | 415 (42.6)                  | 55 (61.8)                       | 47 (62.7)                   | 32 (60.4)                     |
| Missing (N)                                                                          | 16                       | 21                          | 2                               | 4                           | 30                            |

<sup>1</sup> There were no similar adverse events after previous vaccine doses.

<https://doi.org/10.1371/journal.pone.0326231.t003>

**Table 4. Adjusted odds ratios (ORs) for the associations between participants' characteristics and occurrence of an adverse reaction after the booster dose.**

| Multivariate analysis            |         |           |         |
|----------------------------------|---------|-----------|---------|
| Variable                         | OR      | 95% CI    | P value |
| <b>Age</b>                       |         |           |         |
| 60+                              | 1 (Ref) | 1.43-2.34 | <0.001  |
| 45-59                            | 1.83    | 1.51-2.57 | <0.001  |
| 18-39                            | 1.97    |           |         |
| <b>Sex</b>                       |         |           |         |
| Male                             | 1 (Ref) | 1.85-2.74 | <0.001  |
| Female                           | 2.25    |           |         |
| <b>Socioeconomic status</b>      |         |           |         |
| Low                              | 1 (Ref) | 1.14-1.93 | <0.01   |
| Medium                           | 1.48    | 1.17-2.12 | <0.01   |
| High                             | 1.58    |           |         |
| <b>Residence</b>                 |         |           |         |
| City                             | 1 (Ref) | 0.72-1.27 | 0.757   |
| Local council                    | 0.96    | 1.19-2.34 | <0.01   |
| Suburban community               | 1.67    |           |         |
| <b>Comorbidities<sup>1</sup></b> |         |           |         |
| No                               | 1 (Ref) | 0.79-1.24 | 0.953   |
| Yes                              | 0.99    |           |         |

CI= confidence interval; OR= odds ratio;

<sup>1</sup> Comorbidities included hypertension and/or lung disease and/or diabetes and/or heart disease and/or depression and/or anxiety and/or autoimmune disease.

<https://doi.org/10.1371/journal.pone.0326231.t004>



**Table 5. Comorbidities among survey participants and their exacerbations following the booster dose.**

| Comorbidities             | Participants<br>(N=2,049)<br>[N (%)] | Exacerbation following<br>the booster dose<br>[N (%)] <sup>1</sup> |
|---------------------------|--------------------------------------|--------------------------------------------------------------------|
| Hypertension              | 285 (14.1)                           | 18 (6.3)                                                           |
| Lung disease              | 201 (9.9)                            | 14 (7.0)                                                           |
| Diabetes                  | 151 (7.5)                            | 14 (9.3)                                                           |
| Heart disease             | 110 (5.4)                            | 6 (5.5)                                                            |
| Depression and/or anxiety | 91 (4.5)                             | 24 (26.4)                                                          |
| Autoimmune Disease        | 62 (3.1)                             | 15 (24.2)                                                          |

<sup>1</sup> Calculated from those who reported the specific comorbidity.

<https://doi.org/10.1371/journal.pone.0326231.t005>

**Table 6. Health impact among participants who reported adverse events by type of AEs.**

| AEs' health impact                       | Responded<br>N=1,360<br>N (%) <sup>1</sup> | Any AEs<br>N (%) <sup>2</sup> | Local AEs<br>N=327<br>N (%) | Non-local AEs<br>N=220<br>N (%) | Both types<br>N=813<br>N (%) | p-value |
|------------------------------------------|--------------------------------------------|-------------------------------|-----------------------------|---------------------------------|------------------------------|---------|
| Difficulties in regular daily activities | 1,337 (98.3)                               | 589 (44.1)                    | 38 (2.8)                    | 93 (7.0)                        | 458 (34.2)                   | <0.001  |
| Sought medical care                      | 1,286 (94.6)                               | 107 (8.3)                     | 2 (0.2)                     | 21 (1.6)                        | 84 (6.5)                     | <0.001  |
| Hospitalized                             | 1,342 (98.7)                               | 6 (0.5)                       | 1 (0.1)                     | 1 (0.1)                         | 4 (0.3)                      | 0.917   |

<sup>1</sup> Percentage calculated from 1360 respondents.

<sup>2</sup> Percentage calculated from respondents for each type of health impact.

<https://doi.org/10.1371/journal.pone.0326231.t006>

**Table 7. Changes in menstrual cycle after the BNT162b2 booster dose among women <54 years (n=45).**

| Menstrual changes <sup>1</sup>                            | n (%)     |
|-----------------------------------------------------------|-----------|
| Delay in menstruation                                     | 21 (46.7) |
| Heavy menstrual bleeding                                  | 15 (33.3) |
| Earlier menstruation                                      | 13 (28.9) |
| Duration of bleeding longer than usual                    | 12 (26.7) |
| Multiple bleedings during the month following the vaccine | 11 (24.4) |
| Menstrual cramps                                          | 9 (20.0)  |
| Lighter menstrual bleeding                                | 4 (8.9)   |
| Duration of bleeding shorter than usual                   | 2 (4.4)   |
| Unexpected vaginal bleeding after vaccination             | 1 (2.2)   |
| Blood clots                                               | 1 (2.2)   |
| Recurrence of menstruation after amenorrhea               | 1 (2.2)   |

<sup>1</sup> More than one menstrual change could be reported by each respondent.

<https://doi.org/10.1371/journal.pone.0326231.t007>

## Discussion

This survey was conducted by proactively reaching out to booster recipients via telephone. This approach differed from most post-marketing reports of COVID-19 vaccine AEs, which typically relied on passive reporting systems such as VAERS [19,25–27] or the Yellow Card [28]. Furthermore, to the best of our knowledge, most published studies of COVID-19 vaccine AEs to date relied on data either from the passive reporting systems [25–27] or from electronic health records

[20,21]. The advantage of our data collection method is that it increases the likelihood of receiving responses from individuals who would not voluntarily report AEs, as well as from those whose AEs did not require medical care.

Furthermore, our survey's stratification by sex and age groups enabled an equal distribution of female and male respondents across various age groups. This is in contrast to studies that relied on passive reporting of the booster vaccine's AEs, where the number of female respondents was nearly double that of male respondents [25,27]. Additionally, one study [24] indicated 6-fold more AE reporters among <65 years old as compared to those 65 years and older, while another study [26] found that the number of AE reporters aged 65 and older was about 30% higher than in other adult age groups.

In this survey, we found that most AEs following booster vaccination were transient local or general systemic reactions lasting up to three days. Among participants experiencing any AE, only a small percentage (8.3%) sought medical care indicating that most AEs were not severe.

AEs were less common among participants  $\geq 60$  years old and were not associated with pre-existing comorbidities. While the finding that older participants had fewer AEs was consistent with other studies on AEs following the booster dose [25,27], we could not find published data regarding the specific association between COVID-19 booster dose AEs and pre-existing comorbidities. These findings are particularly significant as SARS-CoV-2 continues to circulate and cause disease globally, and the main target populations for periodic COVID-19 boosters, are older individuals and those with pre-existing comorbidities [29]. Counseling on AEs by health care providers is strongly recommended as our findings could assist in reducing the barriers to receiving a booster vaccine by these specific populations. Indications for a higher incidence of AEs among women and younger adults, as shown in the current survey, are consistent with other studies [25,27]. Scholars argued that the occurrence of AEs following BNT162b2 vaccination is associated with enhanced antibody response [30]. In this regard, higher titers of antibodies found among vaccinated females can explain their higher frequency of post-vaccination AEs, compared with males [31,32]. Similarly, the lower antibody response found among older adults vaccinated with the BNT162b2 vaccine may explain the lower frequency of AEs reported by them.

In contrast to local and systemic reactions, allergic and neurological reactions reported in our survey, were infrequent, had a more delayed onset and a longer duration.

In a significant number of participants, these reactions lasted even longer than 21–30 days following the booster dose. It is recommended to raise awareness among health care providers about long-term adverse effects following booster vaccinations.

Regarding patients with comorbidities, our findings indicated that nearly a quarter of the participants with either depression/anxiety or an autoimmune disease reported an exacerbation of their comorbidity following the booster vaccine dose. Deterioration of a psychiatric disease during the COVID-19 pandemic was reported among more than half of the patients with this comorbidity [33,34]. Furthermore, COVID-19 vaccination was found to be associated with a lower incidence of mental illness following COVID-19 disease, as compared with unvaccinated individuals [35]. Thus, the rate of anxiety/depression following the COVID-19 booster reported in our study is likely lower than expected following COVID-19 disease. Flare-ups of autoimmune diseases following COVID-19 vaccination were previously reported. For example, they were reported by 11.3% to 26.7% of patients with autoimmune rheumatic disease [36], and by 5% to 6% of patients with systemic lupus erythematosus [37]. Therefore, it is important to counsel and monitor people with autoimmune and mental diseases after a COVID-19 booster vaccination.

Special emphasis was given in the current survey to changes in the menstrual cycle among women. Approximately 10% of women under the age of 54 reported experiencing menstrual changes after receiving the booster vaccine, with most of them not experiencing such changes following the first or second vaccine doses.

There are currently relatively few studies that address menstrual changes following the booster vaccine. A study from Japan suggested that the COVID-19 booster can be associated with more prolonged menstrual cycles and longer

persistence of menstrual changes compared to the first and second vaccine doses [38]. In this regard, it is important to note that menstrual changes were reported also following COVID-19 disease [39]. An online nationwide survey among 10,319 premenopausal non-pregnant Israeli women found that the type of menstrual disturbances was similar among COVID-19-vaccinated and infected women, primarily characterized by excessive bleeding [40]. These results were recently supported by a multinational study [39]. Our findings and those of others, highlight the necessity to counsel women about what to expect following the COVID-19 booster.

Only one case of myocarditis, which appeared to be mild, was reported following the booster dose. Cases of myocarditis were previously reported following the COVID-19 mRNA vaccine booster dose [41,42]. However, based on studies that relied on VAERS, myocarditis was reported in lower numbers following booster doses as compared with the second dose [42,43].

Despite reports of AEs following the booster dose, vaccination remains highly beneficial. A large study from Italy demonstrated that the bi-valent (Wild-type/Omicron BA.4–5) mRNA booster dose provided additional protection against severe COVID-19 in individuals aged 60 and older for up to six months following booster dose vaccination [44]. This protection extended even to the sub-variants BQ.1 and XBB, which were not included in the booster dose. Similarly, a study from the United Kingdom demonstrated that the bi-valent (Wild-type/Omicron BA.1) booster dose provided extra protection against hospitalization and severe disease caused by the BQ.1, CH.1.1, and XBB.1.5 sub-variants, which were also not included in the booster dose [45]. The findings from these studies suggest that the benefits of the booster vaccine outweigh the risks of forgoing it, especially for individuals at greater risk of developing severe illness.

Our study has several advantages. Specifically, our approach to collecting data regarding AEs increased the likelihood of receiving responses from individuals who would not voluntarily report AEs. It also allowed us to gather information, from individuals experiencing AEs that did not require medical care and, as a result, would not be documented in patients' medical records.

Furthermore, while in our survey there was an almost equal distribution by sex and age group, in studies that rely on passive reporting of AEs related to the booster vaccine, the sex and age distributions varied [25,27]. Thus, our approach helps to reduce selection bias. Another advantage of our survey is the reliance on the national COVID-19 vaccination database and the national SARS-CoV-2 test results database.

This allowed us to sample the entire vaccinated adult population and validate the vaccination status and COVID-19 history of each participant. Finally, our survey collected data on AEs from the booster vaccine among people with pre-existing chronic comorbidities and compared them to previous vaccine doses.

Our survey has several limitations. First, its cross-sectional design does not allow us to determine causal relations between the booster vaccine dose and reported AEs. Second, data collected were self-reported and subjected to recall bias. Third, since this study was conducted through a telephone survey, there may be a non-response bias. Our analysis indicated that the survey respondents did not differ from non-respondents in terms of age, sex, and type of residence. However, we found that individuals with lower socioeconomic status were less likely to respond to the survey compared to those who did. Fourth, self-reported AEs and comorbidities could not be validated by reviewing respondents' medical records, and no data were gathered regarding medication consumption. Fifth, since the purpose of our survey was to evaluate booster recipients from the general population, it did not target populations with specific underlying comorbidities, such as cancer.

## Conclusions

This survey demonstrated that most AEs following the third dose of the Pfizer BNT162b2 vaccine were transient, mild to moderate, local and general systemic reactions (i.e., fatigue, headache, fever). AEs were less prevalent among older participants aged ≥60 years and were not associated with the presence of chronic diseases, the two main target populations

for COVID-19 booster vaccination. We believe the current findings may assist in lowering potential vaccine hesitancy among these populations. On the other hand, the survey showed a higher frequency of AEs among younger people and women, as well as higher frequencies of comorbidity exacerbations among individuals with underlying autoimmune or mental diseases. Therefore, counseling and monitoring for these populations are essential and recommended, as they could also help decrease potential vaccine hesitancy among them.

## Supporting information

### **S1 Table. Outcome of telephone calls to booster vaccine dose recipients.**

(DOCX)

### **S2 Table. Sociodemographic characteristics among survey participants and non-participants.**

(DOCX)

## Author contributions

**Conceptualization:** Dvora Frankenthal, Lital Keinan-Boker, Michal Bromberg.

**Data curation:** Miri Zatlavi, Ziv Karni-Efrati, Aharona Glatman-Freedman.

**Formal analysis:** Miri Zatlavi.

**Investigation:** Dvora Frankenthal, Miri Zatlavi, Ziv Karni-Efrati.

**Methodology:** Dvora Frankenthal, Miri Zatlavi, Lital Keinan-Boker, Michal Bromberg.

**Resources:** Lital Keinan-Boker.

**Supervision:** Dvora Frankenthal, Michal Bromberg.

**Validation:** Aharona Glatman-Freedman.

**Visualization:** Aharona Glatman-Freedman.

**Writing – original draft:** Dvora Frankenthal.

**Writing – review & editing:** Miri Zatlavi, Ziv Karni-Efrati, Lital Keinan-Boker, Aharona Glatman-Freedman, Michal Bromberg.

## References

1. Glatman-Freedman A, Bromberg M, Dichtiar R, Hershkovitz Y, Keinan-Boker L. The BNT162b2 vaccine effectiveness against new COVID-19 cases and complications of breakthrough cases: a nation-wide retrospective longitudinal multiple cohort analysis using individualised data. *EBioMedicine*. 2021;72:103574. <https://doi.org/10.1016/j.ebiom.2021.103574> PMID: [34537449](https://pubmed.ncbi.nlm.nih.gov/34537449/)
2. Glatman-Freedman A, Feldman SF, Hershkovitz Y, Kaufman Z, Dichtiar R, Keinan-Boker L, et al. Vaccine coverage associated with ending a severe acute respiratory syndrome coronavirus 2 (SARS-CoV-2) wave: a retrospective longitudinal analysis. *Clin Infect Dis*. 2023;76(3):e207–15. <https://doi.org/10.1093/cid/ciac524> PMID: [35762838](https://pubmed.ncbi.nlm.nih.gov/35762838/)
3. Centers for Disease Control and Prevention. Staying Up to Date with COVID-19 Vaccines. 2024 [Accessed 2024 November 2]. <https://www.cdc.gov/covid/vaccines/stay-up-to-date.html>
4. Centers for Disease Control and Prevention. CDC Recommends Second Dose of 2024-2025 COVID-19 Vaccine for People 65 Years and Older and for People Who Are Moderately or Severely Immunocompromised. Centers for Disease Control and Prevention; 2024. <https://www.cdc.gov>
5. Shah A, Coiado OC. COVID-19 vaccine and booster hesitation around the world: a literature review. *Front Med (Lausanne)*. 2023;9:1054557. <https://doi.org/10.3389/fmed.2022.1054557> PMID: [36714110](https://pubmed.ncbi.nlm.nih.gov/36714110/)
6. Zhu P, Zhang V, Wagner AL. Demographic differences in compliance with COVID-19 vaccination timing and completion guidelines in the United States. *Vaccines (Basel)*. 2023;11(2):369. <https://doi.org/10.3390/vaccines11020369> PMID: [36851247](https://pubmed.ncbi.nlm.nih.gov/36851247/)
7. Medicines & Healthcare products Regulatory Agency. Coronavirus vaccine - summary of Yellow Card reporting. 2023 [Accessed 2024 November 3]. <https://www.gov.uk/government/publications/coronavirus-covid-19-vaccine-adverse-reactions/coronavirus-vaccine-summary-of-yellow-card-reporting>

8. Centers for Disease Control and Prevention. About the Vaccine Adverse Event Reporting System (VAERS). Accessed 2024 November 3. <https://www.cdc.gov/vaccine-safety-systems/vaers/index.html>
9. Israel Ministry of Health. COVID-19 vaccine adverse event reporting. Accessed 2024 November 3. <https://www.gov.il/en/service/covid-vaccination-side-effects-report>
10. Australian Government Department of Health and Aged Care. Reporting and managing adverse vaccination events 2023 [updated 7 December 2023; cited 2024 3 November 2024]. <https://www.health.gov.au/topics/immunisation/immunisation-information-for-health-professionals/reporting-and-managing-adverse-vaccination-events>
11. Paul-Ehrlich-Institute. Online reporting of side effects. [https://nebenwirkungen.bund.de/nw/EN/home/home\\_node.html](https://nebenwirkungen.bund.de/nw/EN/home/home_node.html)
12. Hwang I, Park K, Kim TE, Kwon Y, Lee YK. COVID-19 vaccine safety monitoring in Republic of Korea from February 26, 2021 to October 31, 2021. *Osong Public Health Res Perspect*. 2021;12(6):396–402.
13. Yamaguchi T, Iwagami M, Ishiguro C, Fujii D, Yamamoto N, Narisawa M. Safety monitoring of COVID-19 vaccines in Japan. *Lancet Reg Health West Pac*. 2022;23:100442.
14. Lin CH, Chen TA, Chiang PH, Hsieh AR, Wu BJ, Chen PY. Incidence and nature of short-term adverse events following COVID-19 second boosters: insights from Taiwan's universal vaccination strategy. *Vaccines*. 2024;12(2).
15. Miller ER, McNeil MM, Moro PL, Duffy J, Su JR. The reporting sensitivity of the Vaccine Adverse Event Reporting System (VAERS) for anaphylaxis and for Guillain-Barré syndrome. *Vaccine*. 2020;38(47):7458–63. <https://doi.org/10.1016/j.vaccine.2020.09.072> PMID: 33039207
16. Centers for Disease Control and Prevention. COVID-19 Vaccine Safety Reporting Systems. Accessed 2024 November 4. <https://www.cdc.gov/vaccine-safety-systems/monitoring/covid-19.html>
17. Chen C, Chen C, Cao L, Fang J, Xiao J. Comparative safety profile of bivalent and original COVID-19 mRNA vaccines regarding myocarditis/pericarditis: a pharmacovigilance study. *Int Immunopharmacol*. 2024;133:112022. <https://doi.org/10.1016/j.intimp.2024.112022> PMID: 38615382
18. Jacobs JW, Booth GS, Adkins BD. Analysis of hematologic adverse events reported to a national surveillance system following COVID-19 bivalent booster vaccination. *Ann Hematol*. 2023;102(4):955–9. <https://doi.org/10.1007/s00277-023-05136-2> PMID: 36795118
19. Hause AM, Baggs J, Marquez P, Abara WE, Baumblatt J, Blanc PG, et al. Safety monitoring of COVID-19 mRNA vaccine second booster doses among adults aged ≥50 years - United States, March 29, 2022–July 10, 2022. *MMWR Morbidity Mortality Weekly Report*. 2022;71(30):971–6.
20. Shoaibi A, Lloyd PC, Wong H-L, Clarke TC, Chillarige Y, Do R, et al. Evaluation of potential adverse events following COVID-19 mRNA vaccination among adults aged 65 years and older: Two self-controlled studies in the U.S. *Vaccine*. 2023;41(32):4666–78. <https://doi.org/10.1016/j.vaccine.2023.06.014> PMID: 37344261
21. Yamin D, Yechezkel M, Arbel R, Beckenstein T, Sergienko R, Duskin-Bitan H, et al. Safety of monovalent and bivalent BNT162b2 mRNA COVID-19 vaccine boosters in at-risk populations in Israel: a large-scale, retrospective, self-controlled case series study. *Lancet Infect Dis*. 2023;23(10):1130–42. [https://doi.org/10.1016/S1473-3099\(23\)00207-4](https://doi.org/10.1016/S1473-3099(23)00207-4) PMID: 37352878
22. Ip S, North T-L, Torabi F, Li Y, Abbasizanjani H, Akbari A, et al. Cohort study of cardiovascular safety of different COVID-19 vaccination doses among 46 million adults in England. *Nat Commun*. 2024;15(1):6085. <https://doi.org/10.1038/s41467-024-49634-x> PMID: 39085208
23. Glatman-Freedman A, Hershkovitz Y, Dichtiar R, Rosenberg A, Keinan-Boker L, Bromberg M. Effectiveness of BNT162b2 vaccine against omicron variant infection among children 5–11 years of age, Israel. *Emerging Infectious Dis*. 2023;29(4):771–7.
24. Menni C, Klaser K, May A, Polidori L, Capdevila J, Louca P, et al. Vaccine side-effects and SARS-CoV-2 infection after vaccination in users of the COVID Symptom Study app in the UK: a prospective observational study. *Lancet Infect Dis*. 2021;21(7):939–49. [https://doi.org/10.1016/S1473-3099\(21\)00224-3](https://doi.org/10.1016/S1473-3099(21)00224-3) PMID: 33930320
25. Chen PY, Wu BJ, Su MC, Lin YH, Chiang SC, Wu JC. Risk factors and incidence rates of self-reported short-term adverse events of COVID-19 vaccine booster dose. *Vaccines*. 2022;10(7).
26. Li Y, Li J, Dang Y, Chen Y, Tao C. Adverse events of COVID-19 vaccines in the United States: temporal and spatial analysis. *JMIR Public Health Surveill*. 2024;10:e51007. <https://doi.org/10.2196/51007> PMID: 39008362
27. Hause AM, Marquez P, Zhang B, Myers TR, Gee J, Su JR. Safety monitoring of bivalent COVID-19 mRNA vaccine booster doses among persons aged ≥12 Years - United States, August 31–October 23, 2022. *MMWR Morbidity Mortality Weekly Rep*. 2022;71(44):1401–6.
28. Ferner RE, Stevens RJ, Anton C, Aronson JK. Spontaneous reporting to regulatory authorities of suspected adverse drug reactions to COVID-19 vaccines over time: the effect of publicity. *Drug Saf*. 2022;45(2):137–44. <https://doi.org/10.1007/s40264-021-01138-z> PMID: 35064899
29. World Health Organization. COVID-19 advice for the public: Getting vaccinated. 2024 [Accessed 2024 November 10]. <https://www.who.int/emergencies/diseases/novel-coronavirus-2019/covid-19-vaccines/advice>
30. Rechavi Y, Shashar M, Lellouche J, Yana M, Yakubovich D, Sharon N. Occurrence of BNT162b2 vaccine adverse reactions is associated with enhanced SARS-CoV-2 IgG antibody response. *Vaccines (Basel)*. 2021;9(9):977. <https://doi.org/10.3390/vaccines9090977> PMID: 34579214
31. Klein SL, Jedlicka A, Pekosz A. The Xs and Y of immune responses to viral vaccines. *Lancet Infect Dis*. 2010;10(5):338–49. [https://doi.org/10.1016/S1473-3099\(10\)70049-9](https://doi.org/10.1016/S1473-3099(10)70049-9) PMID: 20417416
32. Fischinger S, Boudreau CM, Butler AL, Streeck H, Alter G. Sex differences in vaccine-induced humoral immunity. *Semin Immunopathol*. 2019;41(2):239–49.



33. Gobbi S, Piomecka MB, Ashraf Z, Radziński P, Neckels R, Lazzeri S. Worsening of preexisting psychiatric conditions during the COVID-19 pandemic. *Front Psychiatry*. 2020;11:581426. <https://doi.org/10.3389/fpsyt.2020.581426>
34. Fe Garcia-Rada M, Litman RE. Impact of COVID-19 pandemic on patients with Serious Mental Illness (SMI) and nonpsychiatric control subjects in clinical trials. *Innov Clin Neurosci*. 2024;21(1–3):13–8. PMID: [38495606](#)
35. Walker VM, Patalay P, Cuitun Coronado JI, Denholm R, Forbes H, Stafford J. COVID-19 and mental illnesses in vaccinated and unvaccinated people. *JAMA Psychiatry*. 2024;81(11):1071–80.
36. Jagtap K, Naveen R, Day J, Sen P, Vaidya B, Nune A, et al. Flares in autoimmune rheumatic diseases in the post-COVID-19 vaccination period—a cross-sequential study based on COVAD surveys. *Rheumatology (Oxford)*. 2023;62(12):3838–48. <https://doi.org/10.1093/rheumatology/kead144> PMID: [36961331](#)
37. Tangkum P, Kasitanon N, Gumtorntip W, Winichakoon P, Konsamun S, Wongthanee A, et al. COVID-19 vaccination in patients with systemic lupus erythematosus: adverse events and rating agreement of flares between patients and physicians. *Int J Rheum Dis*. 2024;27(12):e70001. <https://doi.org/10.1111/1756-185X.70001> PMID: [39655469](#)
38. Hosoya S, Piedvache A, Nakamura A, Nasu R, Hine M, Itoi S. Prolongation of the menstrual cycle after receipt of the primary series and booster doses of mRNA coronavirus disease 2019 (COVID-19) vaccination. *Obstetrics Gynecol*. 2024;143(2):284–93.
39. Alvergne A, Boniface E, Darney B, Shea A, Weber K, Ventola C. Associations among menstrual cycle length, coronavirus disease 2019 (COVID-19), and vaccination. *Obstetrics Gynecol*. 2024;143(1):83–91.
40. Issakov G, Tzur Y, Friedman T, Tzur T. Abnormal uterine bleeding among COVID-19 vaccinated and recovered women: a national survey. *Reprod Sci*. 2023;30(2):713–21. <https://doi.org/10.1007/s43032-022-01062-2> PMID: [35986194](#)
41. Dorajoo SR, Tan HX, Teo CHD, Neo JW, Koon YL, Ng JJA, et al. Nationwide safety surveillance of COVID-19 mRNA vaccines following primary series and first booster vaccination in Singapore. *Vaccine X*. 2023;15:100419. <https://doi.org/10.1016/j.jvacx.2023.100419> PMID: [38130887](#)
42. Alami A, Villeneuve PJ, Farrell PJ, Mattison D, Farhat N, Haddad N, et al. Myocarditis and Pericarditis Post-mRNA COVID-19 vaccination: insights from a pharmacovigilance perspective. *J Clin Med*. 2023;12(15).
43. Naveed Z, Li J, Naus M, Velásquez García HA, Wilton J, Janjua NZ, et al. A population-based assessment of myocarditis after messenger RNA COVID-19 booster vaccination among adult recipients. *Int J Infect Dis*. 2023;131:75–8. <https://doi.org/10.1016/j.ijid.2023.03.027> PMID: [36967038](#)
44. Fabiani M, Mateo-Urdiales A, Sacco C, Fotakis EA, Battilomo S, Petrone D, et al. Effectiveness against severe COVID-19 of a seasonal booster dose of bivalent (original/Omicron BA.4-5) mRNA vaccines in persons aged ≥60 years: Estimates over calendar time and by time since administration during prevalent circulation of different Omicron subvariants, Italy, 2022–2023. *Vaccine*. 2024;42(23):126026.
45. Kirsebom FCM, Harman K, Lunt RJ, Andrews N, Groves N, Abdul Aziz N, et al. Vaccine effectiveness against hospitalisation estimated using a test-negative case-control study design, and comparative odds of hospital admission and severe outcomes with COVID-19 sub-lineages BQ.1, CH.1.1, and XBB.1.5 in England. *Lancet Reg Health Eur*. 2023;35:100755. <https://doi.org/10.1016/j.lanepe.2023.100755> PMID: [38115965](#)
